# Supplementary material for: Mainstreaming youth-friendly health services into existing primary health care facilities: experiences from South-South Nigeria
Source: publisher site journal article supplement (doi:10.1515/ijamh-2017-0151), 2018-01-25
Supplement: Supplementary file 1 [file ijamh-2017-0151_suppl.docx]

| ***Section 1- Background information***   1. ***Gender***  | *Male* |  | *1* | | --- | --- | --- | | *Female* |  | *2* |  1. ***Age __________________*** 2. ***Highest Educational Qualification***  | *Primary school leaving certificate* |  | *1* | | --- | --- | --- | | *JSCE* |  | *2* | | *SSCE (or its equivalent)* |  | *3* | | *HND* |  | *4* | | *BSc (or its equivalent)* |  | *5* | | *Masters’ Degree* |  | *6* |  1. ***Occupation***  | *Student* |  | *1* | | --- | --- | --- | | *Skilled labour (artisan, trader)* |  | *2* | | *Unskilled labour (* |  | *3* | | *Professional* |  | *4* |  1. ***Marital Status***  | *Single* |  | *1* | | --- | --- | --- | | *Co-habiting* |  | *2* | | *Married* |  | *3* | | *Separated/Divorced* |  | *4* | | *Widowed* |  | *5* |  1. ***No of Children _______________*** 2. ***Religion***  | *Christianity* |  | *1* | | --- | --- | --- | | *Islam* |  | *2* | | *Traditional* |  | *3* | | *Atheist/Agnostic* |  | *4* |  1. ***Denomination (If Religion is Christianity)***  | *Pentecostal* |  | *1* | | --- | --- | --- | | *Orthodox* |  | *2* |  1. ***Average monthly income***  | *0 – N 9,900* |  | *1* | | --- | --- | --- | | *N10,000 – N19,900* |  | *2* | | *N20,000 – N50,000* |  | *3* | | *>N50,000* |  | *4* |   ***Section Two: Availability of Youth Friendly Services***   1. *Do you consider the following health services to be important to young people in this community* | | ***Service*** | *YES (1)* | *NO (0)* | | --- | --- | --- | | *Clinical Preventive Services (e.g immunization, counselling, HIV testing and counselling etc* |  |  | | *Health Outreach Services (e.g schools outreach, community health education)* |  |  | | *Treatment/Curative Services (e.g. laboratory services, pregnancy care)* |  |  | | *Referral to other service providers* |  |  |  1. *Which of these services you consider to be available at the health centre*  | *Clinical Preventive Services (e.g immunization, counselling, HIV testing and counselling etc* | *YES (1)* | *NO (0)* | | --- | --- | --- | | *Health Outreach Services (e.g schools outreach, community health education)* |  |  | | *Treatment/Curative Services (e.g. laboratory services, pregnancy care)* |  |  | | *Referral to other service providers* |  |  |   ***Section Three: Affordability of Youth Friendly Services***   1. *How would you rate the cost of health services at the health centre?*  | *Affordable* |  |  | *1* | | --- | --- | --- | --- | | *Expensive* |  |  | *2* | | *I don’t know* |  |  | *3* |  1. *What do you consider to be a reasonable cost for the following services at the health centre*  | ***Service*** | ***Cost*** | | --- | --- | | *Immunization* |  | | *HIV testing and counselling* |  | | *Contraceptive counselling and services* |  | | *Nutrition education* |  | | *Mental health services* |  | | *Advice and counselling on oral care (teeth and mouth)* |  | | *Counselling and Treatment of Menstrual health problems* |  | | *Treatment of sexually transmitted infections* |  | | *Treatment of common health problems (e.g. malaria, typhoid, injuries)* |  | | *Pregnancy- related care (antenatal and delivery)* |  | |
| --- | --- | --- | --- | --- | --- | --- | --- | --- | --- | --- | --- | --- | --- | --- | --- | --- | --- | --- | --- | --- | --- | --- | --- | --- | --- | --- | --- | --- | --- | --- | --- | --- | --- | --- | --- | --- | --- | --- | --- | --- | --- | --- | --- | --- | --- | --- | --- | --- | --- | --- | --- | --- | --- | --- | --- | --- | --- | --- | --- | --- | --- | --- | --- | --- | --- | --- | --- | --- | --- | --- | --- | --- | --- | --- | --- | --- | --- | --- | --- | --- | --- | --- | --- | --- | --- | --- | --- | --- | --- | --- | --- | --- | --- | --- | --- | --- | --- | --- | --- | --- | --- | --- | --- | --- | --- | --- | --- | --- | --- | --- | --- | --- | --- | --- | --- | --- | --- | --- | --- | --- | --- | --- | --- | --- | --- | --- | --- | --- | --- | --- | --- | --- | --- | --- | --- | --- | --- | --- | --- | --- | --- | --- | --- |
| **Section Four: Acceptability of services**   1. Which of the following services are patronized by young people (50% of them use it)  | **Service** | **YES (1)** | **NO (0)** | ***NA** | | --- | --- | --- | --- | | Immunization |  |  |  | | HIV testing and counselling |  |  |  | | Contraceptive counselling and services |  |  |  | | Nutrition education |  |  |  | | Mental health services |  |  |  | | Advice and counselling on oral care |  |  |  | | Treatment of Menstrual health problems |  |  |  | | Treatment of sexually transmitted infections |  |  |  | | Treatment of common health problems |  |  |  | | Pregnancy- related care (antenatal and delivery) |  |  |  | | Referral to other service providers as necessary |  |  |  |   ***NA- Not available**   1. What are some of the reasons why any of these health services are not patronized by young people in this community (multiple option)  | **Barrier** | **YES (1)** | **NO (0)** | | --- | --- | --- | | Perceived as being for promiscuous people |  |  | | Services are not available |  |  | | Health workers are not available |  |  | | Too expensive |  |  | | Don’t trust the health workers |  |  | | Not acceptable to parents and guardian |  |  | | Against religious beliefs |  |  | | Not acceptable to friends |  |  | | Against traditional/cultural beliefs |  |  | | Others (please specify) |  |  | | **Section Five: Barriers to Youth Friendly services**   1. Are there any barriers to accessing youth friendly services in this community  | Yes |  | 1 | | --- | --- | --- | | No |  | 2 |  1. If yes to above, which of these best describes the barriers (multiple options)  | **Barrier** | **YES (1)** | **NO (0)** | | --- | --- | --- | | Cost is not affordable |  |  | | Difficult to Communicate with health staff |  |  | | Confidentiality/Privacy |  |  | | Difficulty obtaining parental consent |  |  | | Unfriendly environment |  |  | | Unfriendly staff |  |  | | Lack of information about services |  |  | | Others (please specify) |  |  |  1. For which of the following services would you like to see improvements  | **Service** | **YES (1)** | **NO (0)** | | --- | --- | --- | | Immunization, counselling |  |  | | HIV testing and counselling |  |  | | Contraceptive counselling and services |  |  | | Nutrition education |  |  | | Community mental health services |  |  | | Advice and counselling on oral care |  |  | | Treatment of Menstrual health problems |  |  | | Treatment of sexually transmitted infections |  |  | | Treatment of common health problems |  |  | | Pregnancy- related care (antenatal and delivery) |  |  | | Referral to other service providers as necessary |  |  |  1. What improvements do you want to see? |
